# Supplementary material
Source: PubMed Central journal article supplement (PMC2662217)
Supplement: M804240200_1.pdf [file M804240200_1.pdf]

## TSG-6 TRANSFERS PROTEINS BETWEEN GLYCOSAMINOGLYCANS VIA A SER<sub>28</sub>-MEDIATED COVALENT CATALYTIC MECHANISM

Kristian W. Sanggaard, Carsten S. Sonne-Schmidt, Toke P. Krogager, Torsten Kristensen, Hans-Georg Wisniewski, Ida B. Thøgersen, and Jan J. Enghild.

### SUPPLEMENTAL DATA

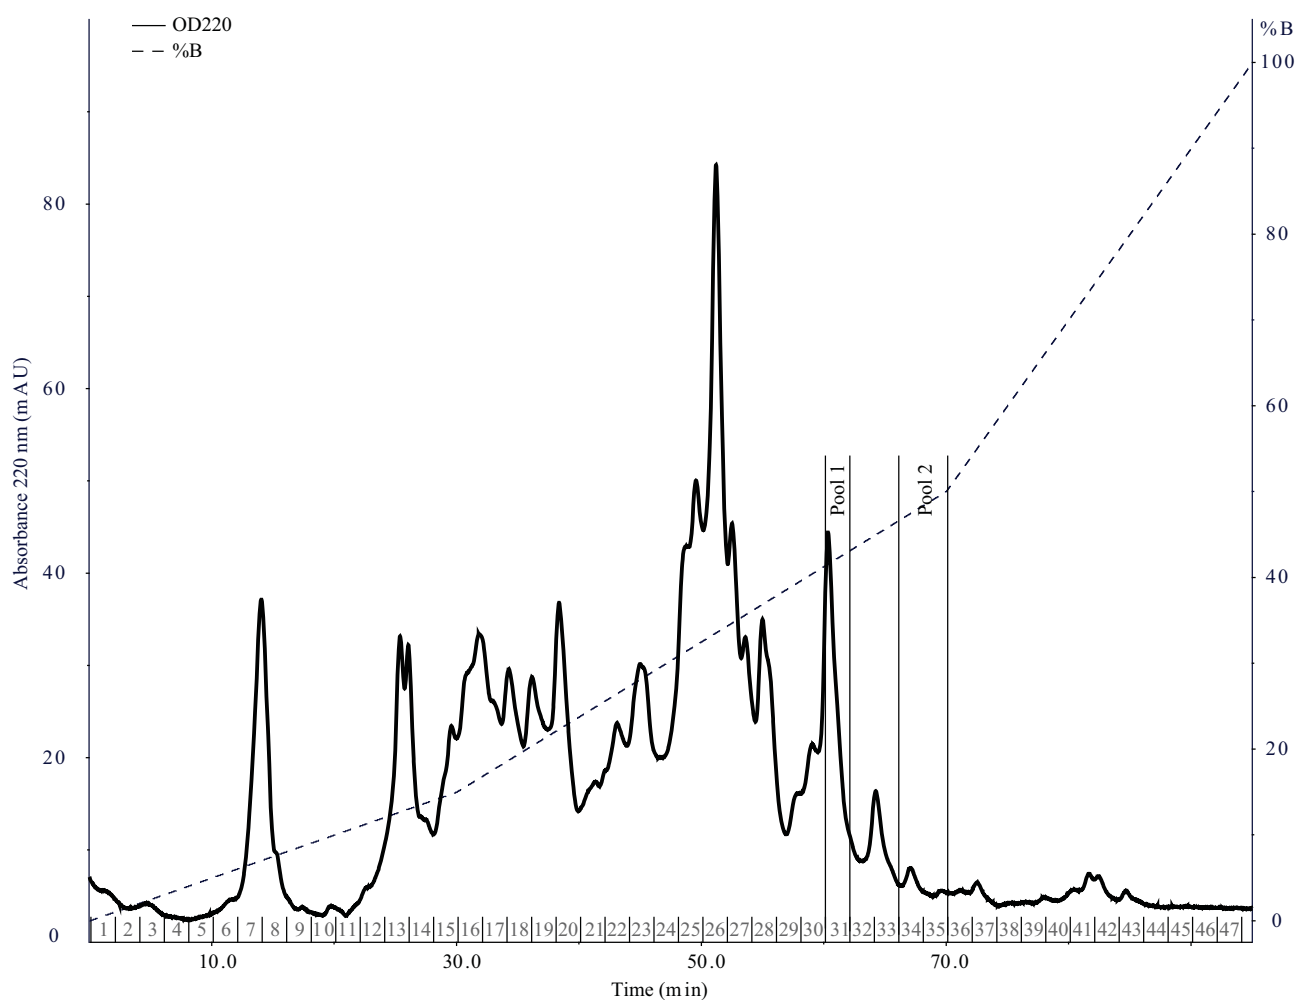

**Fig. S1.** Purification of HC•TSG-6 cross-links using strong cation exchange-HPLC. Purified I $\alpha$ I and TSG-6 were incubated to generate HC•TSG-6 complexes. Subsequently the proteins were denatured and digested with trypsin, and the resulting peptides were applied to a strong cation exchange column. The column was developed by a gradient of increasing KCl concentration and the eluting peptides monitored at 220 nm. The figure shows the strong cation exchange-HPLC trace. The fraction numbers are indicated above the x-axis. Pool 1 and pool 2 were used for subsequently purification of HC1•TSG-6 and HC2•TSG-6, respectively.

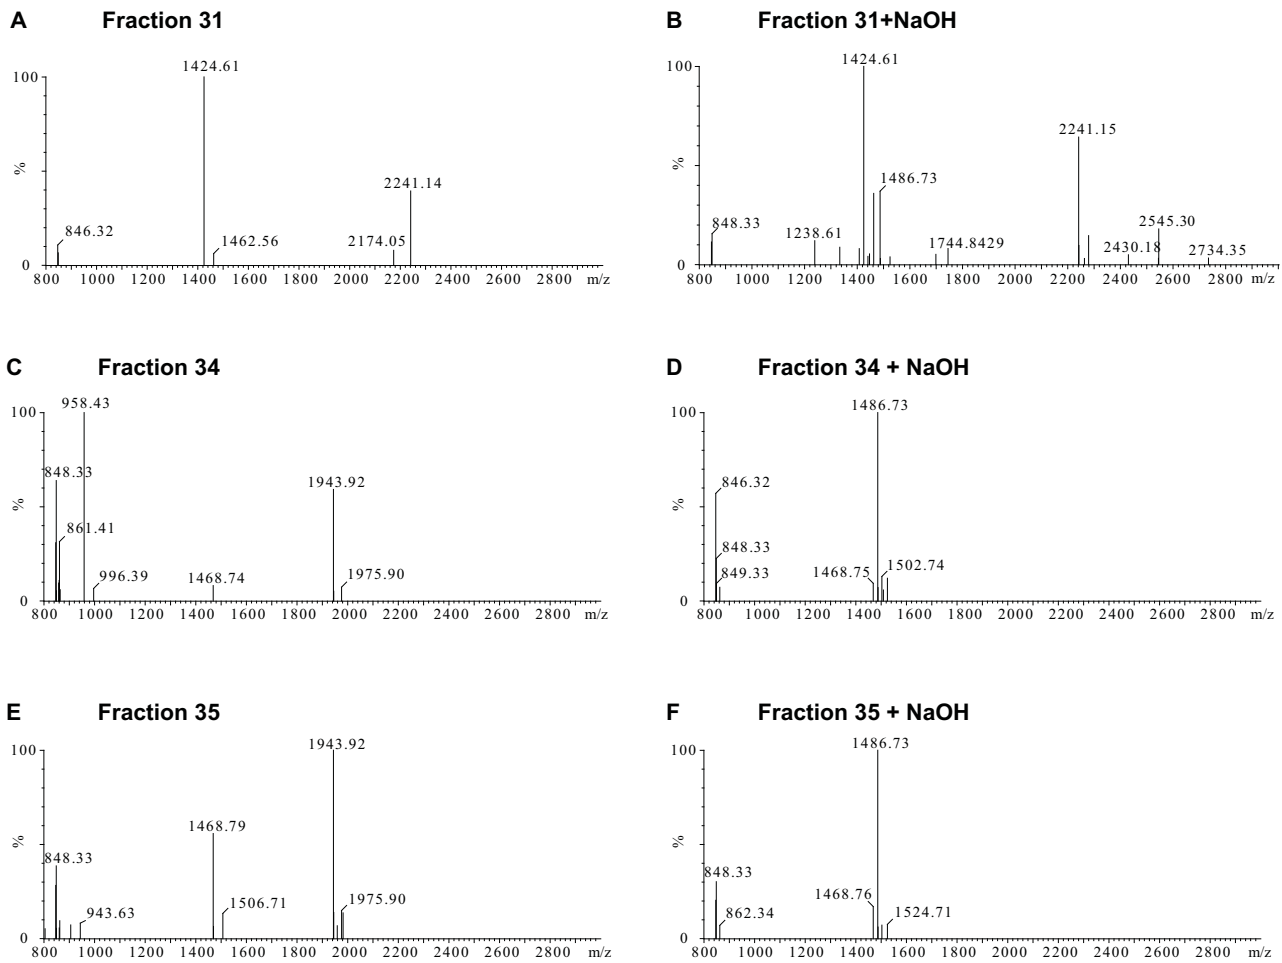

**Fig. S2.** MS analyses of strong cation exchange-HPLC fractions. Fractions 22-44 (+/- NaOH treatment) from the strong cation exchange-HPLC were analyzed by MALDI-TOF MS. The fractions sensitive to NaOH treatment are shown. (A) Fraction 31, (B) fraction 31 after NaOH treatment, (C) fraction 34, (D) fraction 34 after NaOH treatment, (E) fraction 35, and (F) fraction 35 after NaOH treatment. The observed  $MH^+$ 's correspond to the presence of  $HC1 \bullet TSG-6$  cross-link in fraction 31 ( $m/z$  2174.05) and the presence of  $HC2 \bullet TSG-6$  cross-link in fraction 34-35 ( $m/z$  1943.92).

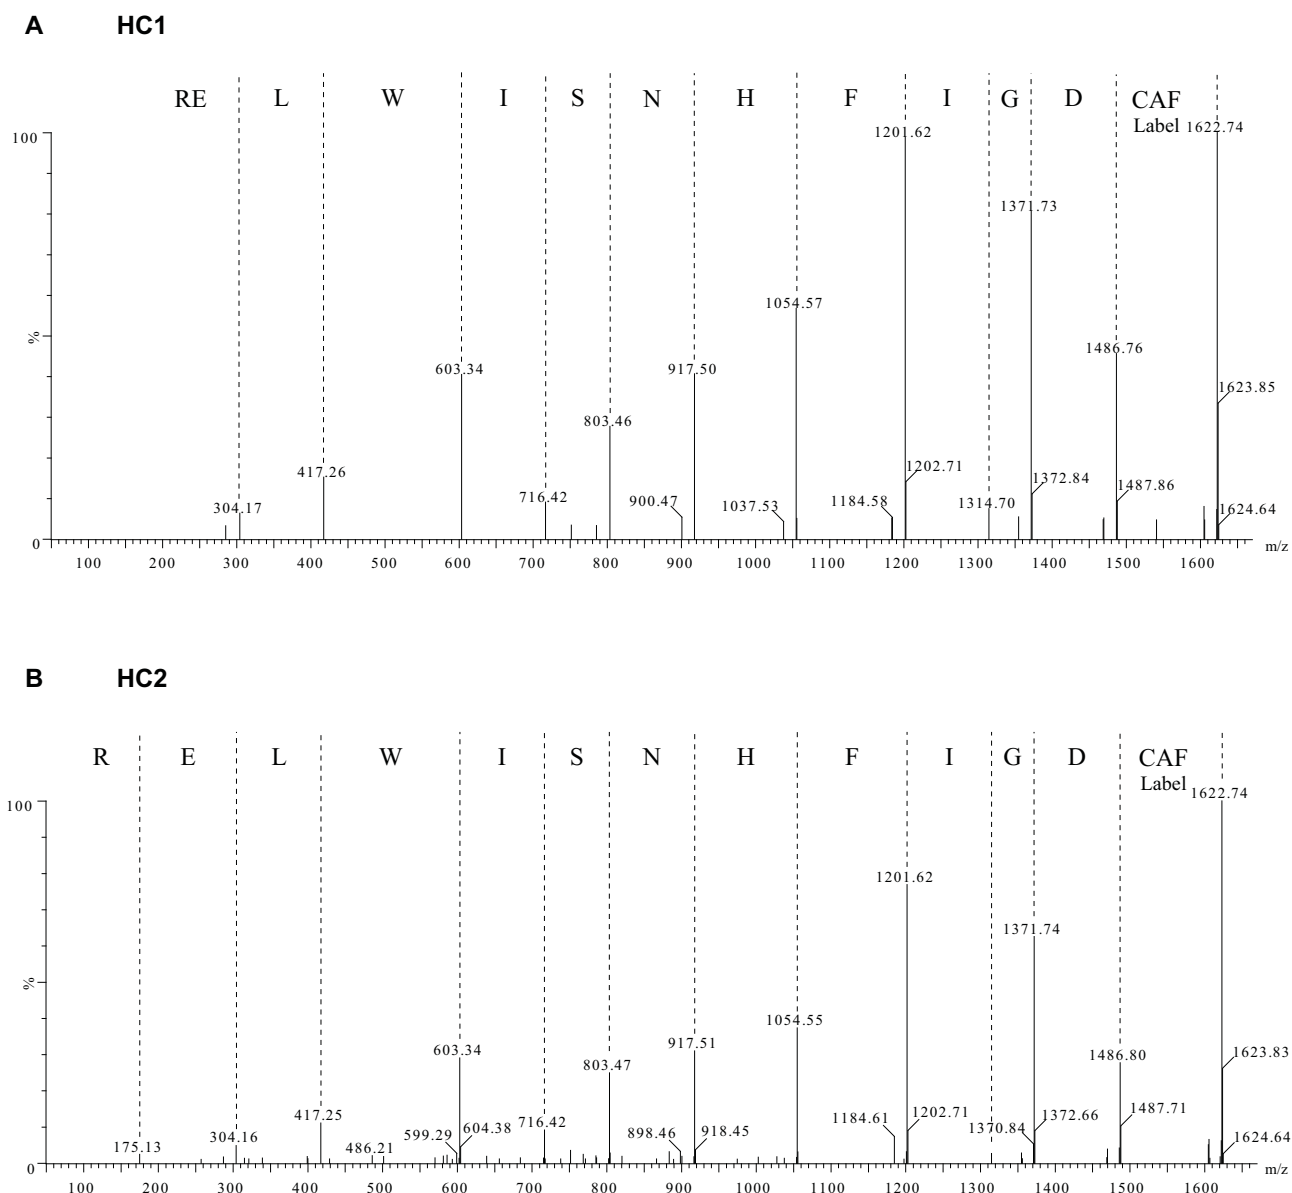

**Fig. S3.** Tandem MS analyses of the tryptic TSG-6 peptide that participates in the cross-links. The tryptic TSG-6 peptide released after NaOH treatment of the cross-links was purified using RP-HPLC, subsequently the peptide was modified using the CAF derivatization protocol, and finally analyzed by tandem MS. (A) MS/MS analysis of the TSG-6 peptide (Fig. 2B, peak  $\beta$ ) released from the HC1•TSG-6 complex. (B) MS/MS analysis of the TSG-6 peptide (Fig. 3B, peak  $\lambda$ ) released from the HC2•TSG-6 complex. The two spectra ((A) and (B)) are very similar and the TSG-6 sequence D<sub>22</sub>GIFHNSIWLER<sub>33</sub> was easily derived from both spectra. In contrast to the MS/MS analysis of the cross-link (Fig. 4) the Ser in the NaOH-released TSG-6 peptide did not lose water upon fragmentation. It supports that Ser<sub>28</sub> is involved in the cross-link.

TABLE S1

*Analysis of fragment ions from MS/MS of the CAF modified HC1•TSG-6 cross-link*

The purified HC1•TSG-6 cross-link (Fig. 2A, peak  $\alpha$ ) was modified using the CAF derivatization protocol and subjected to MS/MS analysis (Fig. 4A-B). The resulting fragment ions were subsequently examined. The CAF protocol favors the formation of Y-ions and only “weak” B-ions were detected. The detected fragment ion series correlate with an ester bond between the internal Ser residue in the TSG-6 peptide and the terminal Asp residue of HC1.

**Y-ions:****Sequence: DGIFHNSIWLER, where Ser is dehydrated.**

| Ion    | MH+         |          | $\Delta$ MH+ | Peptide                              |
|--------|-------------|----------|--------------|--------------------------------------|
|        | Theoretical | Observed |              |                                      |
| Y1"    | 175,13      | -        | -            | R                                    |
| Y2"    | 304,16      | 304,18   | 0,02         | ER                                   |
| Y3"    | 417,25      | 417,26   | 0,01         | LER                                  |
| Y4"    | 603,33      | 603,34   | 0,01         | WLER                                 |
| Y5"    | 716,41      | 716,42   | 0,01         | IWLER                                |
| Y6"    | 785,42      | 785,45   | 0,03         | S(-H <sub>2</sub> O)IWLER            |
| Y7"    | 899,46      | 899,49   | 0,03         | NS(-H <sub>2</sub> O)IWLER           |
| Y8"    | 1036,52     | 1036,56  | 0,04         | HNS(-H <sub>2</sub> O)IWLER          |
| Y9"    | 1183,59     | 1183,62  | 0,03         | FHNS(-H <sub>2</sub> O)IWLER         |
| Y10"   | 1296,68     | -        | -            | IFHNS(-H <sub>2</sub> O)IWLER        |
| Y11"   | 1353,70     | 1353,73  | 0,03         | GIFHNS(-H <sub>2</sub> O)IWLER       |
| Y12"   | 1468,72     | 1468,76  | 0,04         | DGIFHNS(-H <sub>2</sub> O)IWLER      |
| Intact | 1604,72     | 1604,73  | 0,01         | "CAF"DGIFHNS(-H <sub>2</sub> O)IWLER |

**Sequence: DGIFHNSIWLER, with intact Ser.**

| Ion    | MH+         |          | $\Delta$ MH+ | Peptide           |
|--------|-------------|----------|--------------|-------------------|
|        | Theoretical | Observed |              |                   |
| Y2"    | 304,16      | 304,18   | 0,02         | ER                |
| Y3"    | 417,25      | 417,26   | 0,01         | LER               |
| Y4"    | 603,33      | 603,34   | 0,01         | WLER              |
| Y5"    | 716,41      | 716,42   | 0,01         | IWLER             |
| Y6"    | 803,44      | -        | -            | SIWLER            |
| Y7"    | 917,48      | -        | -            | NSIWLER           |
| Y8"    | 1054,54     | 1054,56  | 0,02         | HNSIWLER          |
| Y9"    | 1201,61     | 1201,62  | 0,01         | FHNSIWLER         |
| Y10"   | 1314,70     | -        | -            | IFHNSIWLER        |
| Y11"   | 1371,72     | 1371,76  | 0,04         | GIFHNSIWLER       |
| Y12"   | 1486,74     | 1486,79  | 0,05         | DGIFHNSIWLER      |
| Intact | 1622,74     | 1622,73  | -0,01        | "CAF"DGIFHNSIWLER |

**Sequence: VTGVDTD (cross-linked to DGIFHNSIWLER)**

| Ion    | MH+         |          | $\Delta$ MH+ | Peptide      |
|--------|-------------|----------|--------------|--------------|
|        | Theoretical | Observed |              |              |
| Y1"    | 1737,77*    | 1737,80  | 0,03         | D            |
| Y2"    | 1838,82     | 1838,81  | -0,01        | TD           |
| Y3"    | 1953,85     | 1953,86  | 0,01         | DTD          |
| Y4"    | 2052,91     | 2052,91  | 0,00         | VDTD         |
| Y5"    | 2109,94     | 2109,93  | -0,01        | GVDTD        |
| Y6"    | 2210,98     | 2210,98  | 0,00         | TGVDTD       |
| Y7"    | 2310,05     | 2310,07  | 0,02         | VTGVDTD      |
| Intact | 2446,05     | 2446,05  | 0,00         | "CAF"VTGVDTD |

\* = TSG-6 peptide (1485,74) + CAF (136) + Asp (133,04) - H<sub>2</sub>O (18,02) + H<sup>+</sup> (1,01)

**Sequence: VTGVDTD (cross-linked to GIFHNSIWLER)**

| Ion    | MH+         |          | $\Delta$ MH+ | Peptide      |
|--------|-------------|----------|--------------|--------------|
|        | Theoretical | Observed |              |              |
| Y1"    | 1486,74*    | 1486,79  | 0,05         | D            |
| Y2"    | 1587,79     | 1587,85  | 0,06         | TD           |
| Y3"    | 1702,82     | 1702,84  | 0,02         | DTD          |
| Y4"    | 1801,88     | 1801,95  | 0,07         | VDTD         |
| Y5"    | 1858,91     | 1858,95  | 0,04         | GVDTD        |
| Y6"    | 1959,95     | 1960,00  | 0,05         | TGVDTD       |
| Y7"    | 2059,02     | -        | 0,00         | VTGVDTD      |
| Intact | 2195,02     | 2195,01  | -0,01        | "CAF"VTGVDTD |

\* = TSG-6 peptide (1370,71) + Asp (133,04) - H<sub>2</sub>O (18,02) + H<sup>+</sup> (1,01)

**Sequence: VTGVDTD (cross-linked to FHNSIWLER)**

| Ion    | MH+         |          | $\Delta$ MH+ | Peptide      |
|--------|-------------|----------|--------------|--------------|
|        | Theoretical | Observed |              |              |
| Y1"    | 1316,63*    | 1316,68  | 0,05         | D            |
| Y2"    | 1417,68     | 1417,73  | 0,05         | TD           |
| Y3"    | 1532,70     | 1532,73  | 0,02         | DTD          |
| y4"    | 1631,77     | -        | -            | VDTD         |
| Y5"    | 1688,79     | 1688,86  | 0,07         | GVDTD        |
| Y6"    | 1789,83     | 1789,89  | 0,06         | TGVDTD       |
| Y7"    | 1888,91     | -        | -            | VTGVDTD      |
| Intact | 2024,91     | 2024,93  | 0,02         | "CAF"VTGVDTD |

\* = TSG-6 peptide (1200,60) + Asp (133,04) - H<sub>2</sub>O (18,02) + H<sup>+</sup>(1,01)

**Sequence: VTGVDTD (cross-linked to HNSIWLER)**

| Ion    | MH+         |          | $\Delta$ MH+ | Peptide      |
|--------|-------------|----------|--------------|--------------|
|        | Theoretical | Observed |              |              |
| Y1"    | 1169,57*    | 1169,61  | 0,04         | D            |
| Y2"    | 1270,62     | 1270,65  | 0,03         | TD           |
| Y3"    | 1385,64     | 1385,68  | 0,04         | DTD          |
| Y4"    | 1484,71     | -        | -            | VDTD         |
| Y5"    | 1541,73     | 1541,76  | 0,03         | GVDTD        |
| Y6"    | 1642,78     | 1642,85  | 0,07         | TGVDTD       |
| Y7"    | 1741,85     | -        | -            | VTGVDTD      |
| Intact | 1877,85     | 1877,86  | 0,01         | "CAF"VTGVDTD |

\* = TSG-6 peptide (1053,54) + Asp (133,04) - H<sub>2</sub>O (18,02) + H<sup>+</sup>(1,01)

**Sequence: VTGVDTD (cross-linked to NSIWLER)**

| Ion    | MH+         |          | $\Delta$ MH+ | Peptide      |
|--------|-------------|----------|--------------|--------------|
|        | Theoretical | Observed |              |              |
| Y1"    | 1032,51*    | 1032,53  | 0,02         | D            |
| Y2"    | 1133,56     | 1133,59  | 0,03         | TD           |
| Y3"    | 1248,59     | 1248,61  | 0,02         | DTD          |
| Y4"    | 1347,66     | -        | -            | VDTD         |
| Y5"    | 1404,68     | 1404,70  | 0,02         | GVDTD        |
| Y6"    | 1505,73     | 1505,74  | 0,01         | TGVDTD       |
| Y7"    | 1604,80     | -        | -            | VTGVDTD      |
| Intact | 1740,80     | 1740,83  | 0,03         | "CAF"VTGVDTD |

\* = TSG-6 peptide (916,48) + Asp (133,04) - H<sub>2</sub>O (18,02) + H<sup>+</sup> (1,01)

**Sequence: VTGVDTD (cross-linked to SIWLER)**

| Ion    | MH+         |          | $\Delta$ MH+ | Peptide      |
|--------|-------------|----------|--------------|--------------|
|        | Theoretical | Observed |              |              |
| Y1"    | 918,46*     | 918,49   | 0,03         | D            |
| Y2"    | 1019,52     | 1019,53  | 0,01         | TD           |
| Y3"    | 1134,55     | 1134,54  | -0,01        | DTD          |
| Y4"    | 1233,62     | -        | -            | VDTD         |
| Y5"    | 1290,64     | 1290,67  | 0,03         | GVDTD        |
| Y6"    | 1391,69     | 1391,74  | 0,05         | TGVDTD       |
| Y7"    | 1490,76     | -        | -            | VTGVDTD      |
| Intact | 1626,76     | 1626,77  | 0,01         | "CAF"VTGVDTD |

\* = TSG-6 peptide (802,43) + Asp (133,04) - H<sub>2</sub>O (18,02) + H<sup>+</sup> (1,01)

**B-ions:**

**Sequence: DGIFHNSIWLER, where Ser is dehydrated.**

| Ion    | MH+         |          | $\Delta$ MH+ | Peptide                              |
|--------|-------------|----------|--------------|--------------------------------------|
|        | Theoretical | Observed |              |                                      |
| B1"    | 252,04      | -        | -            | "CAF"D                               |
| B2"    | 309,06      | -        | -            | "CAF"DG                              |
| B3"    | 422,14      | -        | -            | "CAF"DGI                             |
| B4"    | 569,21      | -        | -            | "CAF"DGIF                            |
| B5"    | 706,27      | -        | -            | "CAF"DGIFH                           |
| B6"    | 820,31      | 830,30   | -0,01        | "CAF"DGIFHN                          |
| B7"    | 889,32      | 889,34   | 0,02         | "CAF"DGIFHNS(-H <sub>2</sub> O)      |
| B8"    | 1002,41     | 1002,41  | 0,00         | "CAF"DGIFHNS(-H <sub>2</sub> O)I     |
| B9"    | 1188,49     | -        | -            | "CAF"DGIFHNS(-H <sub>2</sub> O)IW    |
| B10"   | 1301,57     | -        | -            | "CAF"DGIFHNS(-H <sub>2</sub> O)IWL   |
| B11"   | 1430,61     | -        | -            | "CAF"DGIFHNS(-H <sub>2</sub> O)IWLE  |
| Intact | 1604,72     | 1604,73  | 0,01         | "CAF"DGIFHNS(-H <sub>2</sub> O)IWLER |

TABLE S2

*Analysis of fragment ions from MS/MS of CAF modified HC2•TSG-6 cross-link*

The purified HC2•TSG-6 cross-link (Fig. 3A, peak  $\gamma$ ) was modified using the CAF derivatization protocol and subjected to MS/MS analysis (Fig. 4C-D). The resulting fragment ions were subsequently examined. The CAF protocol favors Y-ions and only a single “weak” B-ion series was detected. The detected fragment ion series correlate with an ester bond between the internal Ser residue in the TSG-6 peptide and the terminal Asp residue of HC2.

**Y-ions:****Sequence: DGIFHNSIWLER, where Ser is dehydrated.**

| Ion    | MH+         |          | $\Delta$ MH+ | Peptide                              |
|--------|-------------|----------|--------------|--------------------------------------|
|        | Theoretical | Observed |              |                                      |
| Y1"    | 175,13      | 175,14   | 0,01         | R                                    |
| Y2"    | 304,16      | 304,17   | 0,01         | ER                                   |
| Y3"    | 417,25      | 417,24   | -0,01        | LER                                  |
| Y4"    | 603,33      | 603,32   | -0,01        | WLER                                 |
| Y5"    | 716,41      | 716,40   | -0,01        | IWLER                                |
| Y6"    | 785,42      | 785,42   | 0,00         | S(-H <sub>2</sub> O)IWLER            |
| Y7"    | 899,46      | 899,47   | 0,01         | NS(-H <sub>2</sub> O)IWLER           |
| Y8"    | 1036,52     | 1036,51  | -0,01        | HNS(-H <sub>2</sub> O)IWLER          |
| Y9"    | 1183,59     | 1183,58  | -0,01        | FHNS(-H <sub>2</sub> O)IWLER         |
| Y10"   | 1296,68     | -        | -            | IFHNS(-H <sub>2</sub> O)IWLER        |
| Y11"   | 1353,70     | 1353,70  | 0,00         | GIFHNS(-H <sub>2</sub> O)IWLER       |
| Y12"   | 1468,72     | 1468,70  | -0,02        | DGIFHNS(-H <sub>2</sub> O)IWLER      |
| Intact | 1604,72     | 1604,69  | -0,03        | "CAF"DGIFHNS(-H <sub>2</sub> O)IWLER |

**Sequence: DGIFHNSIWLER, with intact Ser.**

| Ion    | MH+         |          | $\Delta$ MH+ | Peptide           |
|--------|-------------|----------|--------------|-------------------|
|        | Theoretical | Observed |              |                   |
| Y2"    | 304,16      | 304,17   | 0,01         | ER                |
| Y3"    | 417,25      | 417,24   | -0,01        | LER               |
| Y4"    | 603,33      | 603,32   | -0,01        | WLER              |
| Y5"    | 716,41      | 716,40   | -0,01        | IWLER             |
| Y6"    | 803,44      | 803,43   | -0,01        | SIWLER            |
| Y7"    | 917,48      | -        | -            | NSIWLER           |
| Y8"    | 1054,54     | 1054,53  | -0,01        | HNSIWLER          |
| Y9"    | 1201,61     | 1201,59  | -0,02        | FHNSIWLER         |
| Y10"   | 1314,70     | -        | -            | IFHNSIWLER        |
| Y11"   | 1371,72     | 1371,70  | -0,02        | GIFHNSIWLER       |
| Y12"   | 1486,74     | 1486,73  | -0,01        | DGIFHNSIWLER      |
| Intact | 1622,74     | 1622,70  | -0,04        | "CAF"DGIFHNSIWLER |

**Sequence: VEND (cross-linked to DGIFHNSIWLER)**

| Ion    | MH+         |          | $\Delta$ MH+ | Peptide   |
|--------|-------------|----------|--------------|-----------|
|        | Theoretical | Observed |              |           |
| Y1"    | 1737,77*    | 1737,72  | -0,05        | D         |
| Y2"    | 1851,81     | 1851,78  | -0,03        | ND        |
| Y3"    | 1980,86     | 1980,80  | -0,06        | END       |
| Y4"    | 2079,92     | 2079,88  | -0,04        | VEND      |
| Intact | 2215,92     | 2215,86  | -0,06        | "CAF"VEND |

\* = TSG-6 peptide (1485,74) + CAF (136) + Asp (133,04) - H<sub>2</sub>O (18,02) + H<sup>+</sup> (1,01)

**Sequence: VEND (cross-linked to GIFHNSIWLER)**

| Ion    | MH+         |          | $\Delta$ MH+ | Peptide   |
|--------|-------------|----------|--------------|-----------|
|        | Theoretical | Observed |              |           |
| Y1"    | 1486,74*    | 1486,73  | -0,01        | D         |
| Y2"    | 1600,78     | 1600,75  | -0,03        | ND        |
| Y3"    | 1729,83     | 1729,82  | -0,01        | END       |
| Y4"    | 1828,89     | 1828,89  | 0,00         | VEND      |
| Intact | 1964,89     | 1964,87  | -0,02        | "CAF"VEND |

\* = TSG-6 peptide (1370,71) + Asp (133,04) - H<sub>2</sub>O (18,02) + H<sup>+</sup> (1,01)

**Sequence: VEND (cross-linked to FHNSIWLER)**

| Ion    | MH+         |          | $\Delta$ MH+ | Peptide   |
|--------|-------------|----------|--------------|-----------|
|        | Theoretical | Observed |              |           |
| Y1"    | 1316,63*    | 1316,62  | -0,01        | D         |
| Y2"    | 1430,67     | 1430,65  | -0,02        | ND        |
| Y3"    | 1559,72     | 1559,71  | -0,01        | END       |
| y4"    | 1658,78     | 1658,76  | -0,02        | VEND      |
| Intact | 1794,78     | 1794,75  | -0,03        | "CAF"VEND |

\* = TSG-6 peptide (1200,60) + Asp (133,04) - H<sub>2</sub>O (18,02) + H<sup>+</sup>(1,01)

**Sequence: VEND (cross-linked to HNSIWLER)**

| Ion    | MH+         |          | $\Delta$ MH+ | Peptide   |
|--------|-------------|----------|--------------|-----------|
|        | Theoretical | Observed |              |           |
| Y1"    | 1169,57*    | 1169,56  | -0,02        | D         |
| Y2"    | 1283,61     | 1283,60  | -0,01        | ND        |
| Y3"    | 1412,66     | 1412,63  | -0,03        | END       |
| Y4"    | 1511,72     | 1511,71  | -0,01        | VEND      |
| Intact | 1647,72     | 1647,68  | -0,04        | "CAF"VEND |

\* = TSG-6 peptide (1053,54) + Asp (133,04) - H<sub>2</sub>O (18,02) + H<sup>+</sup>(1,01)

**Sequence: VEND (cross-linked to NSIWLER)**

| Ion    | MH+         |          | $\Delta$ MH+ | Peptide   |
|--------|-------------|----------|--------------|-----------|
|        | Theoretical | Observed |              |           |
| Y1"    | 1032,51*    | 1032,49  | -0,02        | D         |
| Y2"    | 1146,55     | 1146,54  | -0,01        | ND        |
| Y3"    | 1275,60     | 1275,58  | -0,02        | END       |
| Y4"    | 1374,66     | 1374,63  | -0,03        | VEND      |
| Intact | 1510,66     | 1510,63  | -0,03        | "CAF"VEND |

\* = TSG-6 peptide (916,48) + Asp (133,04) - H<sub>2</sub>O (18,02) + H<sup>+</sup> (1,01)



**Sequence: VEND (cross-linked to SIWLER)**

| Ion    | MH+         |          | $\Delta$ MH+ | Peptide   |
|--------|-------------|----------|--------------|-----------|
|        | Theoretical | Observed |              |           |
| Y1"    | 918,46*     | 918,45   | -0,01        | D         |
| Y2"    | 1032,50     | 1032,49  | -0,01        | ND        |
| Y3"    | 1161,55     | 1161,55  | 0,00         | END       |
| Y4"    | 1260,61     | 1260,61  | 0,00         | VEND      |
| Intact | 1396,61     | -        | -            | "CAF"VEND |

\* = TSG-6 peptide (802,43) + Asp (133,04) - H2O (18,02) + H+ (1,01)

**B-ions:**

**Sequence: DGIFHNSIWLER, where Ser is dehydrated.**

| Ion    | MH+         |          | $\Delta$ MH+ | Peptide                              |
|--------|-------------|----------|--------------|--------------------------------------|
|        | Theoretical | Observed |              |                                      |
| B1"    | 252,04      | -        | -            | "CAF"D                               |
| B2"    | 309,06      | -        | -            | "CAF"DG                              |
| B3"    | 422,14      | -        | -            | "CAF"DGI                             |
| B4"    | 569,21      | -        | -            | "CAF"DGIF                            |
| B5"    | 706,27      | -        | -            | "CAF"DGIFH                           |
| B6"    | 820,31      | 820,28   | -0,03        | "CAF"DGIFHN                          |
| B7"    | 889,32      | 889,31   | -0,01        | "CAF"DGIFHNS(-H <sub>2</sub> O)      |
| B8"    | 1002,41     | 1002,39  | -0,02        | "CAF"DGIFHNS(-H <sub>2</sub> O)I     |
| B9"    | 1188,49     | -        | -            | "CAF"DGIFHNS(-H <sub>2</sub> O)IW    |
| B10"   | 1301,57     | -        | -            | "CAF"DGIFHNS(-H <sub>2</sub> O)IWL   |
| B11"   | 1430,61     | 1430,65  | 0,04         | "CAF"DGIFHNS(-H <sub>2</sub> O)IWLE  |
| Intact | 1604,72     | 1604,69  | -0,03        | "CAF"DGIFHNS(-H <sub>2</sub> O)IWLER |

TABLE S3

*NH<sub>2</sub>-terminal protein sequencing of the purified HC•TSG-6 cross-links and unreacted TSG-6*The cross-linked HC1 and TSG-6 peptides (peak  $\alpha$ ):

| Position           | 22   | 23   | 24   | 25   | 26   | 27   | <b>28</b> | 29  | 30 | 31  | 32  | 33 |
|--------------------|------|------|------|------|------|------|-----------|-----|----|-----|-----|----|
| TSG-6, residue:    | D    | G    | I    | F    | H    | N    | <b>S</b>  | I   | W  | L   | E   | R  |
| Amount (pmol):     | 25.1 | 14.6 | 7.0  | 9.0  | 3.8  | 5.9  | -         | 1.6 | -  | 1.3 | 0.9 | -  |
| % of initial yield | 100  | 58.2 | 27.9 | 35.9 | 15.1 | 23.5 | -         | 6.4 | -  | 5.2 | 3.6 | -  |

| Position           | 632  | 633  | 634  | 635  | 636  | 637  | 638 |
|--------------------|------|------|------|------|------|------|-----|
| HC1, residue:      | V    | T    | G    | V    | D    | T    | D   |
| Amount (pmol):     | 25.5 | 12.0 | 18.8 | 8.5  | 11.7 | 3.2  | -   |
| % of initial yield | 100  | 47.1 | 73.7 | 33.3 | 45.9 | 12.5 | -   |

The cross-linked HC2 and TSG-6 peptides (peak  $\gamma$ ):

| Position           | 22   | 23   | 24   | 25   | 26   | 27   | <b>28</b> | 29   | 30 | 31  | 32  | 33 |
|--------------------|------|------|------|------|------|------|-----------|------|----|-----|-----|----|
| TSG-6, residue:    | D    | G    | I    | F    | H    | N    | <b>S</b>  | I    | W  | L   | E   | R  |
| Amount (pmol):     | 15.9 | 17.1 | 9.5  | 9.4  | 3.5  | 6.2  | -         | 1.7  | -  | 1.2 | 1.1 | -  |
| % of initial yield | 100  | 108  | 59.7 | 59.1 | 22.0 | 39.0 | -         | 10.7 | -  | 7.5 | 6.9 | -  |

| Position           | 645  | 646  | 647  | 648 |
|--------------------|------|------|------|-----|
| HC2, residue:      | V    | E    | N    | D   |
| Amount (pmol):     | 34.5 | 23.6 | 16.1 | -   |
| % of initial yield | 100  | 68.4 | 46.7 | -   |

## TSG-6 (unreacted):

| Position           | 18 | 19   | 20   | 21   | 22   | 23   | 24   | 25   | 26   | 27   | <b>28</b>   | 29   |
|--------------------|----|------|------|------|------|------|------|------|------|------|-------------|------|
| Residue:           | W  | G    | F    | K    | D    | G    | I    | F    | H    | N    | <b>S</b>    | I    |
| Amount (pmol):     | -  | 36.0 | 31.8 | 7.7  | 26.5 | 23.1 | 15.7 | 17.3 | 4.2  | 7.8  | <b>7.2</b>  | 8.1  |
| % of initial yield | -  | 100  | 88.3 | 21.4 | 73.6 | 64.2 | 43.6 | 48.1 | 11.7 | 21.7 | <b>20.0</b> | 22.5 |

| Position           | 30 | 31   | 32   | 33 | 34   | 35   | 36   |
|--------------------|----|------|------|----|------|------|------|
| Residue:           | W  | L    | E    | R  | A    | A    | G    |
| Amount (pmol):     | -  | 7.1  | 5.0  | -  | 9.6  | 10.8 | 9.2  |
| % of initial yield | -  | 19.7 | 13.9 | -  | 26.7 | 30.0 | 25.6 |

TABLE S4

*LC-MS/MS analyses of TSG-6 expressed in mammalian cells.*

Concentrated medium from mammalian cells transfected with respectively wild type TSG-6 cDNA, S28A mutant TSG-6 cDNA, and extracellular superoxide dismutase cDNA (control) were resolved by SDS-PAGE. Bands of interest were excised, digested with trypsin and analyzed by LC-MS/MS. Several proteins were positively identified by the Mascot search engine in each of the three analyzed media samples. TSG-6 was identified in medium from both the transfection with wild type cDNA and from the transfection with mutant cDNA, but not in the medium from the control transfection. The identification of TSG-6 is shown below. The data demonstrates that both wild type and mutant TSG-6 have been expressed. *Mr (Expt)*, the experimental derived relative molecular mass. *Mr (Calc)*, calculated relative molecular mass.

Expression of wild type TSG-6:

Protein score: 260

MS/MS spectrum number: 45

Matched MS/MS spectrum: 6

Sequence coverage: 23 %

| Peptides        | Mr (Expt) | Mr (Calc) | $\Delta$ Mr | Peptide score |
|-----------------|-----------|-----------|-------------|---------------|
| LTYAEAK         | 794.33    | 794.42    | -0.09       | 25            |
| TGIIDYGIR       | 1006.42   | 1006.54   | -0.12       | 55            |
| ECGGVFTDPK      | 1122.37   | 1122.50   | -0.13       | 38            |
| WDAYCYNPHAK     | 1437.42   | 1437.61   | -0.19       | 24            |
| DGIFHNSIWLER    | 1485.56   | 1485.74   | -0.18       | 48            |
| FLSDASVTAGGFQIK | 1539.60   | 1539.79   | -0.20       | 70            |

Expression of mutant S28A TSG-6:

Protein score: 103

MS/MS spectrum number: 38

Matched MS/MS spectrum: 3

Sequence coverage: 10 %

| Peptides   | Mr (Expt) | Mr (Calc) | $\Delta$ Mr | Peptide score |
|------------|-----------|-----------|-------------|---------------|
| TGIIDYGIR  | 1006.44   | 1006.54   | -0.10       | 54            |
| YVAMDPVSK  | 1008.39   | 1008.49   | -0.10       | 17            |
| ECGGVFTDPK | 1122.39   | 1122.50   | -0.12       | 32            |
